# Supplementary material for: Efficient human iPS cell derivation by a non-integrating plasmid from blood cells with unique epigenetic and gene expression signatures
Source: PubMed Central journal article supplement — Cell Res. 2011 Jan 18;21(3):518–29. doi: 10.1038/cr.2011.12 (PMC3193421; doi:10.1038/cr.2011.12), 2011-01-18
Supplement: cr201112x1.pdf [file cr201112x1.pdf]

**A**

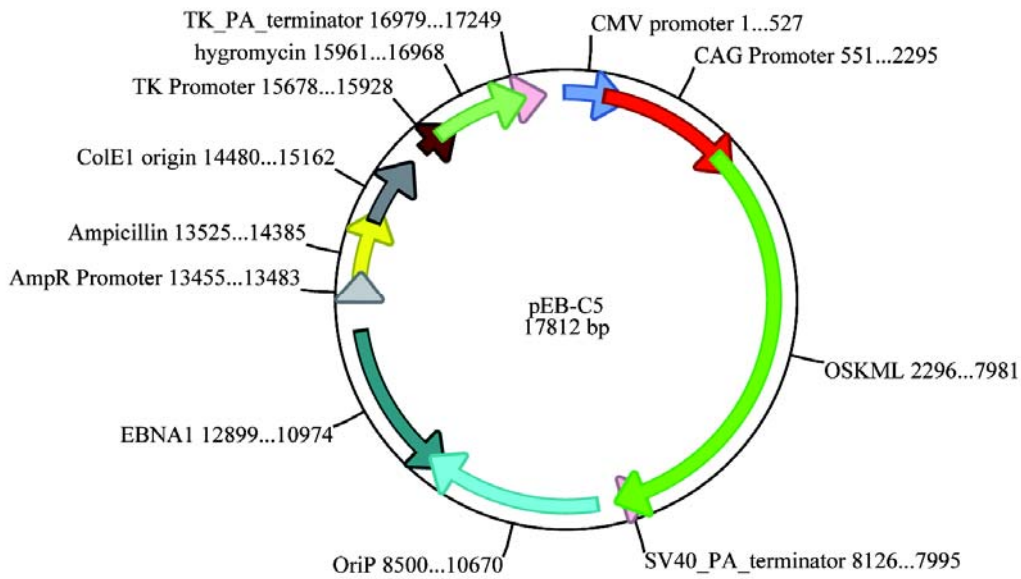

**B**

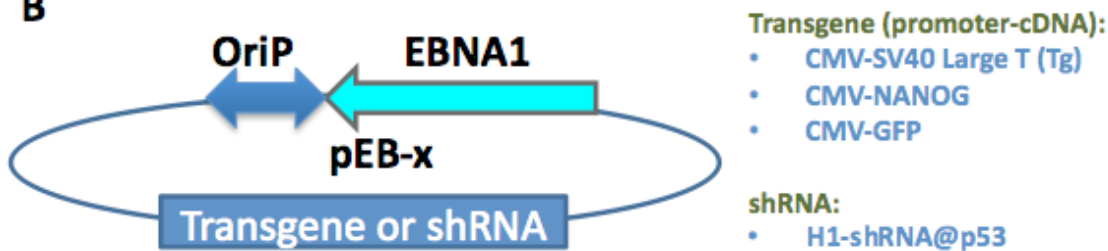

**Supplementary information, Figure S1 Diagrams of novel episomal vectors used in this report, based on an EBNA1/OriP-containing plasmid.**

**(A).** A reprogramming vector expressing *Oct4*, *Sox2*, *Klf4*, *c-Myc* and *Lin28* (OSKML) under the control of a chimeric promoter CAG (refer Methods). The plasmid pEB-C5 is also abbreviated later as C5. **(B).** Three supplementary episomal vectors expressing SV40 viral large T antigen (Tg) or NANOG transgene or an shRNA knocking down p53. In some experiments, pEB-GFP (under the control of the CMV promoter) was used as a vector control. See details in *Methods*.
