# Supplementary material for: Efficient human iPS cell derivation by a non-integrating plasmid from blood cells with unique epigenetic and gene expression signatures
Source: PubMed Central journal article supplement — Cell Res. 2011 Jan 18;21(3):518–29. doi: 10.1038/cr.2011.12 (PMC3193421; doi:10.1038/cr.2011.12), 2011-01-18
Supplement: cr201112x2.pdf [file cr201112x2.pdf]

>pEB-C5 vector DNA sequence

```
1 cgttacataa cttacggtaa atggcccgcg tggctgaccg cccaacgacc cccgccatt
61 gacgtcaata atgacgatg ttcccatagt aacgccaata gggactttcc attgacgtca
121 atgggtggag tatttacggt aaactgcccc cttggcagta catcaagtgt atcatatgcc
181 aagtcgcccc cctattgacg tcaatgacgg taaatggccc gctcggcatt atgcccagta
241 catgacctta cgggactttc ctacttggca gtacatctac gtattagta tegtattac
301 catggtgatg cggttttggc agtacaccaa tgggcgtgga tagcggtttg actcacgggg
361 atttccaagt ctccaccoca ttgacgtcaa tgggagtttg ttttggcacc aaaatcaacg
421 ggactttcca aaatgctga ataaccocgc cccgtgacg caaatgggag gtaggcgtgt
481 acgggtggag gtctatataa gcagagctcg tttagtgaac cgtcagatct ctagaagctg
541 ggtaccagct gctagcatgg gcccatctcg acattgatta ttgactagtt attaatagta
601 atcaattacg gggtcattag ttcatagccc atatatggag ttcccggtta cataacttac
661 ggtaaatggc cgcctctcgt gaccgcccc aacgccccgc ccattgacgt caataatgac
721 gtatgttccc atagtaacgc caatagggac tttccattga cgtcaatggg tggactattt
781 acggtaaaact gccaccctgg cagtacatca agtgtatcat atgccaagta cccccctat
841 tgacgtcaat gcggtgaaat ggcccgcctg gcattatgcc cagtacatga ctttatggga
901 ctttccactt tggcagtaca tctacgtatt agtcatcgct attaccatgg gtcgaggtga
961 gccccacggt ctgcttctct ctccccatct cccccctct cccaaccoca attttgtatt
1021 tatttatttt ttaattattt tgtgcagcga tggggggcggg gggggggggg gcgcgcgcca
1081 gggggggcgg gggggggcga gggggggggc gggggcgagg ggagaggtgc gggcgagcc
1141 aatcagagcg gcgctctcgt aagtttccct tttatggcga ggcggcgggc gggcgggccc
1201 tataaaaagc gaagcgcgcg gcggggcgga gtcgctgctg tgctctcgcc cgtgccccg
1261 ctccgcgccc cctcgcgcgc ccgcgcccg ctctgactga ccgcttact cccacaggtg
1321 agcgggcccg acggcccttc tcctccgggc tghtaattag gcttggttta atgcaggtc
1381 ttttcttttc tgtggctgcg taaaagcctt aaagggtctc gggagggccc tttgtcggg
1441 ggggagcggc tgggggggtg cgtgctgtg tgtgtgctg gggagcgcg cgtgcgccc
1501 gcgctgcccc gcgctgtgca gcgctgcccc cgcggcgcg ggtttgtgc gctccgctg
1561 tgcgagaggg gcgagcgccc gggggcggtg ccccgcggtg cgggggggct gcgaggggaa
1621 caaaggctgc gtgccccgtg tgtgctggtg ggggtgagca ggggggtggt gcgccccgt
1681 cgggctgtaa cccccctctg cccccctct cccaggttgc tgagcagcgc cgggctcgg
1741 gtgccccggc ccgtgccccg cgtggcgccc ggctcgcctg gccggggcgg ggggtggcgg
1801 aggtgggggt gccggggcgg gcggggcgcg ctccggcgcg ggaaggctcg ggggagggg
1861 gcggcgccc cggagcgccc gcgctgtctg aggcgcggcg agcccgacc attgctttt
1921 atggtaaatc tgcgagaggg cgcagggact tcctttgtcc caaatctggc ggagccgaaa
1981 tctgggagge gccgcccac ccctctagc gggcgcgggc gaagcgggtc ggcgcccga
2041 ggaaggaaat gggcggggag ggcttctgct cgtgcccgcg ccgctgccc cttctccatc
2101 tccagcctcg gggctgccc agggggacgg ctgcttctcg gggggacggg gcagggcggg
2161 gttcggcttc tggcgtgtga ccggcgctc tagagcctct gctaaccatg ttcattgctt
2221 cttctttttc ctacagctcc tgggcaacgt gctggttgtt gtgctgtctc atcattttg
2281 caaagaattc agatccacca tggctggaca cctggttca gacttgcct tctcaccoc
2341 accaggtggg ggtgatgggt cagcagggct ggagccgggc tgggtGGTTC Ctcgaacctg
2401 gctaagcttc caaggcctc cagggtgggc tggaaatcga ccaggctcag aggtattggg
2461 gatctcccc tgtccgccc caticagatt ctgcccaggg atggcatact gtggacctca
2521 ggttgactg ggcctagtcc cccaagtgg cgtggagact ttgcagcctg agggccaggc
2581 aggagcacga gtgaaaagca actcagaggg aacctcctct gagcctctg ccgaccgccc
2641 caatgcccgt aagttggaga aggtggaacc aactcccag gagtcccagg acatgaaagc
2701 cctgcagaag gactagaaac agtttgccaa gctgctgaag cagaagagga tcacctggg
2761 gtacacccag gccgacgtgg ggctcacctt gggcgttctc tttggaaagg tttcagcca
2821 gaccaccatc tgtcgcttcg aggccttga gctcagcctt aagaacatgt gtaagctgcg
2881 gccctgctg gagaagtggg tggaggaagc cgacaacaat gagaacctg aggagatag
2941 caaatcggag accctggtgc agccccggaa gagaagcga actagcattg agaacctgt
3001 gaggtggagt ctggagacca tgtttctgaa gtgcccgaag cctccctac agcagatcac
3061 tcacatcgcc aatcagctg gcttagaaga ggtatggtt cgagtatggt tctgtaaccg
3121 gcgccagaag ggcacaagat caagtattga gtattcccaa cagaagagat atgagctac
3181 agggacacct ttcccagggg gggctgtatc ctttctctg cccccaggtc cccactttg
3241 cccccaggc tatggaagcc cccactcac cacactctac tcagtcctt tctctgagg
3301 cgaggccttt ccctctgttc ccgtcactgc tctgggctct cccatgcatt caaacggcg
3361 cgggtccgga gggagggcca gaggaagtct tctaactatg ggtgacgtgg aggagaatcc
3421 tggcccaatg tataacatga tggagacgga gctgaagccg cggggcccgc agcaagcttc
3481 gggggcgccc ggcggaggag gcaacgccc acggcgcgcg accggcgcca accagaagaa
3541 cagccccgac cgcgtcaaga ggcccatgaa cgccttcatg gtatggtccc gggggcagcg
3601 gcgtaagatg gccagggaga accccaagat gcacaactcg gagatcagca agcgcctggg
3661 cgcgagtggt aaacttttgt ccgagaccga gaagcggccg ttcacgacg aggccaaagc
3721 gctgcgctgc ctgcacatga aggagcacc ggattataaa tacccggcgc ggcggaaaac
3781 caagacgctc atgaagaagg ataagtacac gottcccgga ggttggctgg cccccggcg
3841 gaacagcatg gcgagcgggg ttgggggtgg cgcggcctg ggtgccccg tgaaccagc
3901 catggacagc tacgcgaca tgaacggctg gagcaacggc agctacagca tgatgcagga
3961 gcagctgggg taccgcgac acccgggcct caacgctcac ggcgcccac agatgcaacc
4021 gatgcaaccg tacgacgtca gcgcccgtga gtacaactcc atgaccagct cgcgacctca
4081 catgaaagcc tcgcccacct acagcatgtc ctactcgcag cagggcacc cgggtatggc
4141 gctgggctcc atgggctctg tggtaagtc cgaggccagc tccagcccc cgtggttac
4201 ctcttctctc cactccaggg cgcctgcca ggccggggac ctccgggaca tgatcagcat
4261 gtacctcccc gcgcccaggg tgcggagcc cgtcgcgcc agtagactgc acatggcca
4321 gcaactaccag agcggcccgg tgcgggac ggccattaac ggcacactgc cctgtcga
4381 catggcgccc ggtccggag gagagggcag aggaagtct ctaacatcgc gtgacgtgga
4441 ggagaatcct ggcccaatgg ctgtcagcga cgtctgctc cgtccttct ccaggtcgc
4501 gtcggcccgc gcgggaaggg agaagacact gcgtccagca ggtgcccga ctaaccgtt
```

4561 gcgtgaggaa ctctctcaca tgaagcgact tccccactt cccggccgcc cctacgacct  
4621 ggcggcgacg gtggccacag acctggagag tggcgagact ggtgcagctt gcagcagtaa  
4681 caaccgggcc ctcttagccc ggagggagac cgaggagtcc aacgacctcc tggacctaga  
4741 ctttatoctt tccaactcgc taaccaccca ggaatcggty gccgccaccg tgaccacctc  
4801 ggcgtcagct tcatcctcgt ctccccggc gagcagcggc cctgccagcg cgcctccac  
4861 ctgcagcttc agctatccga tccgggcccgg gggtagcccg ggcgtggctg ccagaaacac  
4921 aggtggaggg ctctcttaca gccgagaatc tgcgccacct cccacggccc cttcaacct  
4981 gggggacatc aatgacgtga gccctcggg cggcttcgtg gctgagctcc tgcggccgga  
5041 gttggaccca gtatacatc gccccacagca gcctcagccg ccagggtggg ggctgatggg  
5101 caagtttgtg ctgaaggcgt ctctgaccac ccctggcagc gagtacagca gcccttcggt  
5161 catcagtggt agcaaaggaa gccccagacgg cagccaccoc gtggtagtgg gccctacag  
5221 cggtagggccc ccgcgcatg gccccaagat taagcaagag gcggtcccgt cctgcacggt  
5281 cagccggctc ctagaggccc atttgagcgc tggaccocag ctacagcaag gccaccggcc  
5341 caacacacac gacttcccc tggggcggca gctccccacc aggactaccc ctacactgag  
5401 tcccaggaggaa ctgctgaaca gcagggactg tcacctggc ctgcctctc ccccaggatt  
5461 ccatccccat ccgggggcca actacctcc tttcctgcca cccagatgc agtcacaagt  
5521 cccctctctc cattatcaag agctcatgcc accgggttcc tgcctgcccag agggcccaca  
5581 gccaaagagg ggaagaaggt cgtggccccc gaaaagaaca gccaccaca cttgtgacta  
5641 tgcaggctgt ggcaaacct ataccaagag ttctcatctc aaggcacacc tgcgaactca  
5701 cacaggcgag aaaccttacc actgtgactg ggacggctgt ggggtgaaat tgcgccgctc  
5761 cgatgaactg accaggcact accgcaaca cacagggcac cggcccttc agtgccagaa  
5821 gtgtgacagg gccttttcca ggtcggacca ccttgctta cacatgaaga ggcactttgg  
5881 cagcggaaaa cagctgttga attttgacct tctcaagttg gcgggagacg tggagtccaa  
5941 cccagggcccc ctgagatgc cctcaactg gaacttacc aacaggaact atgacctcga  
6001 ctacgactcc gtacagcctt atttcatctg cgacgaggaa gagaatttct atcaccagca  
6061 acagcagagc gagctgcagc cgcgccgcc cagtgaggat atctggaaga aattcgagct  
6121 gcttccccac ccgcccctg ccccagaccg ccgctccggg ctctgctctc catcctatgt  
6181 tgcgctcgct acgtcctct cccaaggga agacgatgac ggcggcgctg gcaactctc  
6241 caccgccgat cagctggaga tgatgaccga gttacttggg ggagacatgg tgaaccagag  
6301 cttcatctgc gatcctgacg acgagacctt catcaagaac atcatcatcc aggactgtat  
6361 gtggagcggg ttctcagccg ctgccaaagt ggtctcggag aagctggcct cctaccaggg  
6421 tgcgcgcaaaa gacagcaca gccctgagccc cgcgcgggg cacagcgtc gctccacctc  
6481 cagcctgtac ctgcaggacc tcaccgccgc cgcgctccgag tgcattgacc cctcagtggt  
6541 ctttccctac ccgctcaacg acagcagctc gcccaaatcc tgtacctcgt ccgattccac  
6601 ggccttctct ctctcctcgg actcgtcgt gtcctccgag tctccccac gggccagccc  
6661 tgagccccta gtgctgcagc aggagacacc gccaccacc agcagcagct ctgaagaaga  
6721 gcaagaagat gaggagaaga ttgatgtggt gtctgtggag aagaggcaaa ccctgccaa  
6781 gaggctcggg tgggctcat ctccatccc aggccacagc aaacctccgc acagcccact  
6841 ggtcctcaag aggtgccacg tctccactca ccagcacaac tacgcccac cccctccac  
6901 aaggaaggac tatccagctg ccaagagggc caagttggac agtggcaggg tccctgaagca  
6961 gatcagcaac aaccgcaagt gctccagccc caggtcctca gacacggagg aaaacgacaa  
7021 gaggcggaca cacaactctc tggaaactca gaggaggaa gagctgaagc gcagctttt  
7081 tgccctgcgt gaccagatcc ctgaattgga aaacaacgaa aaggccccc aggtagtgat  
7141 cctcaaaaaa gccaccgctt acatcctgct cattcaagca gacgagcaca agctcacctc  
7201 tgaaaaggac ttattgagga aacgacgaga acagtgaaa cacaaactcg aacagcttcg  
7261 aaactctggt gcagggcggc ggtccggagg agagggcaga ggaagtctt taacatgccc  
7321 tgacgtggag gagaatcctg gcccaatggg ctcggtgtcc aaccagcagc ttgcaggtgg  
7381 ctgcgccaaag gcagcggaga agggcccaga ggaggcccg cctgacgcgg cccgagcggc  
7441 agacgagccc cagctgctgc acggggccgg catctgtaag tggttcaacg tgcgcatggg  
7501 gttcggcttc ctgtctatga ccgcccgcgc cggggtcgcg ctgaccccc aggtggagct  
7561 ctttgtgcac cagagcaagc tgcacatgga agggttccga agcctcaagg agggtagggc  
7621 ggtggagtcc accttaaga agtctgcca ggtctggaa tccatccgtg tccactggccc  
7681 tgggtgtgtg ttctgtattg gaagtgagc gcggccaaag gggagaaca tgcagaagcg  
7741 aagatccaaa ggagacaagt gctacaactg cggtagggta gaccatcatg ccaaggaatg  
7801 caagctgcca cccagccca agaagtgcca cttttgcca agcatcaacc atatggtggc  
7861 ctcggtcca ctgaaggccc agcaggccc cagttctcag ggaagcctg cctactccg  
7921 ggaggaagag gaagatccc acagcctgc cctgctcca gaagcccaga attgactcga  
7981 ggcggcaag gccggatcca gacatgataa gatacattga tgagtttggg caaaccacaa  
8041 ctagaatgca gtgaaaaaaa tgctttatt gtgaaattg tgatgctatt gctttattg  
8101 taaccattat aagctgcaat aaacaagtta acaacaacaa ttgcattcat tttatgttc  
8161 aggttcaggg ggaggtggg aggtttttta aagcaagtaa aacctctaca aatgtggtat  
8221 ggctgattat gatccggctg cctcgcgcgt ttcggtgatg acggtgaaaa cctctgacac  
8281 atgcagctcc cggagacggt cacagctgt ctgtaagcgg atgcccggag cagacaagcc  
8341 cgtcagggcg cgtcagcggg tgttggcggg tgcggggcg cagccatgac cggctgactc  
8401 tagagcccc ccgcccgaag aactaaacct gactacggca tctctgcccc ttctcgtc  
8461 gtacgaggg cgcctttgtt ttgtattcgg ggcagtgcat gtaacctctt cagttggtg  
8521 gtacaacttg ccaactgggc cctgttccac atgtgacacg gggggggacc aaacacaaag  
8581 gggttctctg actgtagttg acatccttat aaatggatgt gcacatttgc caaactgag  
8641 tggctttcat cctggagcag actttgcatg ctgtggactg caacacaaca ttgctttat  
8701 gtgtaactct tggctgaagc tcttacacca atgctggggg acatgtacct cccagggggc  
8761 caggaagact acgggagct acaccaact caatcagagg gccctgtgta gctaccgata  
8821 agcggaccct caagagggca ttagcaatag tgtttataag gccctctgt taaccctaaa  
8881 cgggtagcct atgcttccc ggtagtagta tatactatcc gactaaacc taattcaata  
8941 gcatatgtta cccaacggga agcatatgct atcgaattag ggttagtaaa agggctctaa  
9001 ggaacagcga tatctcccac ccatgagct gtcacggttt tatttacatg gggtaggat  
9061 tccacgaggg tagtgaacca ttttagtcac aagggcagtg gctgaagatc aaggagcggg  
9121 cagtgaaact tcctgaactc tgcgctgctt cttcattctc cttcgtttag ctaatagaat

9181 aactgctgag ttgtgaacag taagggtgat gtgaggtgct cgaaaacaag gtttcaggtg  
9241 acgccccag aataaaattt ggacgggggg ttcagtgggtg gcattgtgct atgacaccaa  
9301 tataaccctc acaaaacctt tgggcaataa atactagtgt aggaatgaaa cattctgaat  
9361 atctttaaca atagaaaatcc atgggggtggg gacaagccgt aaagactgga tgtccatctc  
9421 acacgaatth atggctatgg gcaacacata atcctagtgc aatatgatac tggggttatt  
9481 aagatgtgtc ccaggcaggg accaagacag gtgaacctg ttgttacact ctatttgtaa  
9541 caaggggaaa gagagtggac gccgacagca gggactcca ctggttgtct ctaacacccc  
9601 cgaaaaataa acggggctcc acgccaatgg ggccataaaa caaagacaag tggccactct  
9661 tttttttgaa attgtggagt gggggcacgc gtcagcccc acacgcccgc ctgcggtttt  
9721 ggactgtaaa ataagggtgt aataacttgg ctgattgtaa ccccgctaac cactgcggtc  
9781 aaaccacttg cccacaaaac cactaatggc accccgggga atacctgat aagtaggtgg  
9841 cgggggcaag atagggggcg gattgtgctg atctggagga caaattacac acacttgctg  
9901 ctgagcgcca agcacagggt tgttggctct catatccacg aggtcgctga gagcacgggtg  
9961 ggctaattgt gccatgggta gcatatacta cccaaatctc tggatagcat atgctatcct  
10021 aatctatatac tgggtagcat aggctatcct aatctatatac tgggtagcat atgctatcct  
10081 aatctatatac tgggtagcat atgctatcct aatctatatac tgggtagcat aggctatcct  
10141 aatctatatac tgggtagcat atgctatcct aatctatatac tgggtagcat atgctatcct  
10201 aatctgtatc cgggtagcat atgctatcct aatagagatt agggtagtat atgctatcct  
10261 aatctatatac tgggtagcat atactaccca aatatctgga tagcatatgc tatcctaatac  
10321 tataatctggg tagcatatgc tatcctaatac tataatctggg tagcatatgc tatcctaatac  
10381 tataatctggg tagcatatgc tataatctggg tagcatatgc tataatctggg tagcatatgc tatcctaatac  
10441 tataatctggg tagcatatgc tataatctggg tagcatatgc tataatctggg tagcatatgc tatcctaatac  
10501 tataatctggg tagcatatgc tataatctggg tagcatatgc tataatctggg tagcatatgc tatcctaatac  
10561 catatacagt cagcatatga taccagtag tagagtggga tggctatcct ttgcatatgc  
10621 cgccacctcc caagggggcg tgaatthtgc ctgcttgtcc ttttctgca tgcgtggtgc  
10681 tcccatctct aggtgaattht aaggaggcca ggctaaagcc gtcgcatgct tgattgctca  
10741 ccaggtaaat gtcgctaatt ttttccaacg cgagaagggtg ttgagcgctg agctgagtgga  
10801 cgtgacaaca cgtgcaaca caattgcccc atggtgggag gacgaaaaatg gtgacaagac  
10861 agatggccag aaatacacca acagcacgca tgatgtctac tggggattta ttctttagtg  
10921 cgggggaata cacggctttt aatacagatt agggcgctct ctaacaagtt acatcactcc  
10981 tgccctctct caccctcacc tccatcacct ccttcatctc cgtcatctcc gtcacaccc  
11041 tccgcgccag cccctcacc cataggtgga aaccagggag gcaaatctac tccatcgta  
11101 aagctgcaca cagtcaccct gatattgcag gtaggagcgg gctttgtcat aacaaggtcc  
11161 ttaatcgcat ccttcaaaac ctacgcaaat atatgagttt gtaaaaagac catgaaataa  
11221 cagacaatgg actcccttag cgggcccagg tgtgggcccg gtcagggggc cattccaaag  
11281 gggagacgac tcaatgggtg aagacgacat tgtggaatag caagggcagtt cctctgctt  
11341 aggttgtaaa gggaggtctt actacctcca tatacgaaca caccggcgac ccaagttcct  
11401 tctgctgtag tcccttttac gtgactccta gccagggagag ctcttaaaac ttctgcaatg  
11461 ttctcaaaat tccggttggg acctccttga ccacgatgct ttccaaaccca cctcctttt  
11521 ttgcgctgct ctcctcacc ctgaccccgg ggtccagtgct ttgggctctc tctggtgca  
11581 tctgcggggc cctgctctat cgtcccggg ggcacgctcag gctcaccatc tgggcccact  
11641 tcttgggtgtt attcaaaata atcggtctcc cctacaggggt ggaaaaatgg ccttctacct  
11701 ggagggggcc tgcgcggtgg agaccgggat gatgatgact gactactggg actcctgggc  
11761 ctcttttctc cacgtccaag acctctcccc ctggtctttt cacgacttcc cccctgggt  
11821 ctttcacgct cctcaccocg ggggctcca ctacctcctc gaccocggcc tccactacct  
11881 cctcgacccc ggcctcacc gcctcctcga ccccgccctc cacctcctgc tctgccccct  
11941 cctgctcctg tccctcctcc tgcctcctcc cctcctgccc cctcctgccc tgcctcctc  
12001 gccctcctg cctcctgccc tctgcccct cctgctcctg cccctcctgc cctcctcct  
12061 gctcctgccc cctcctgccc tctcctgct cctgcccctc ctgcccctcc tgcctcctg  
12121 cctcctgccc cctcctgccc tgcctcctc gcccctcctg cctcctgccc tctcctgccc  
12181 gccctcctg cctcctgccc tctcctgct gccctcctg cccctcctgc cctcctcct  
12241 gctcctgccc cctcctgccc tgcctcctc gcccctcctg cccctcctgc tctgcccct  
12301 cctcctgctc ctgcccctc tgcctcctc gcccctcctc ctgctcctgc cctcctgccc  
12361 cctcctcctg cctcctgccc tctcctgct cctgcccctc ctgcccctcc tgcctcctc  
12421 cctgctcctg cccctcctgc cctcctcctc gctcctgccc ctctcctgct tctgcccct  
12481 cctgcccctc ctgcccctc tctcctgct gccctcctc ctgctcctgc cctcctgccc  
12541 cctcctgccc cctcctgccc tctcctgct cctgcccctc ctctcctgct tgcctcctc  
12601 gctcctgccc cctcctgccc tgcctcctc cctgctccac cgtgggtccc ttgagagcca  
12661 atgcaacttg gacgtttttg gggctctccg acaccatctc tatgtcttgg cctgctcct  
12721 gagcgcggcg gggctcctgg tcttccgctt cctcctcctc gctccttcc cctgctcctg  
12781 ccatggttat caccctctct tctttgaggt ccaactgcgc cggagccttc tggccagat  
12841 gtgtctccct tctctcctag gccatttcca ggtcctgtac ctggcccctc gtcagacatg  
12901 attcacacta aaagagatca atagacatct ttattagacg acgctcagtg aatacagggga  
12961 gtgcagactc ctgcccctc caacagcccc cccacctca tccccttcat ggtcgtgct  
13021 agacagatcc aggtctgaaa attccccatc ctccgaacca tctcgtctct catcacaat  
13081 tactcgcagc ccggaaaaact cccgctgaac atcctcaaga ttgctgctct gacctcaag  
13141 ccaggcctca aattcctcgt cccctttttt gctggacgggt agggatgggg attctcggga  
13201 cccctcctc tctcttcaaa ggtcaccaga cagagatgct actggggcaa cggaaagaaa  
13261 gctgggtgcg gccctgtgag atcagcttat cgatgataag ctgtcaaaa tgagaattct  
13321 tgaagacgaa agggcctcgt gatagccta tttttatagg ttaatgtcat gataataatg  
13381 gtttctttaga cgtcaggtgg cacttttcgg ggaaatgtgc gcggaacccc tatttgttta  
13441 tttttctaaa tacattcaaa tatgtatccg ctcatgagac aataaccctg ataaatgctt  
13501 caataatatt gaaaaaggaa gagtatgagt attcaacatt tccgtgtgct ccttatccc  
13561 ttttttgctg cattttgctt tctgtttttt gctcaccag aaacgctggt gaaagtaaaa  
13621 gatgctgaag atcagttggg tgcacagagtg ggttacatcg aactggatct caacagcgtg  
13681 aagatccttg agagttttc ccccgaaaga cgttttccaa tgatgagcac ttttaaagtt  
13741 ctgctatgtg gcgcggtatt atcccgtgtt gacgcccggg aagagcaact cggctcgcgc

13801 atacactatt ctcagaatga cttgggtgag tactcaccag tcacagaaaa gcatcttacg  
13861 gatggcatga cagtaagaga attatgcagt gctgcataaa ccatgagtga taacactgcg  
13921 gccaaacttac ttctgacaac gatcggagga ccgaaggagc taaccgcttt ttgacacaac  
13981 atggggggatc atgtaactcg ccttgatcgt tgggaaccgg agctgaatga agccatacca  
14041 aacgacgagc gtgacaccac gatgcctgca gcaatggcaa caactgtgcy caaactatta  
14101 actggcggaac tacttactct agcttcccgg caacaatata tagactggat ggagggcgat  
14161 aaagttgcag gaccacttct gcgctcggcc cttccggctg gctggtttat tgctgataaa  
14221 tctggagccg gtgagcgtgg gtctcgcggg atcattgcag cactggggcc agatggttaag  
14281 ccctccgcta tcgtagttat ctacacgacg gggagtcagg caactatgga tgaacgaaat  
14341 agacagatcg ctgagatagg tgccctcactg attaagcatt ggtaactgtc agaccaagtt  
14401 tactcatata tacttttagat tgatttaaaa cttcatTTTT aatttaaaag gatctagggtg  
14461 aagatccttt ttgataatct catgacccaa atcccttaac gtgagttttc gttccactga  
14521 gcgtcagacc ccgtagaaaa gatcaaaagg tttcttgtag atcccttttt tctgcgcgta  
14581 atctgctgct tgcaaaaaaaa aaaaccaccg ctaccagcgg tggtttggtt gccggatcaa  
14641 gagctaccaa ctctttttcc gaaggtaact ggcttcagca gagcgagat accaaatact  
14701 gtccttctag tgtagccgta gttaggccac cacttcaaga actctgtagc accgcctaca  
14761 tacctcgctc tcgtaatcct gttaccagtg gctgctgcca gtggcgataa gtcgtgtott  
14821 accgggttgg actcaagacg atagttaccg gataaggcgc agcggctcgg ctgacgggg  
14881 ggttcgtgca cacagcccag cttggagcga acgacctaca ccgaactgag atacctacag  
14941 cgtgagctat gagaagcgc cacgcttccc gaaggagaaa aggcggacag gtatccggta  
15001 agcggcaggg ccggaacacg agagcgcacg agggagcttc cagggggaaa cgctgggtat  
15061 ctttatagtc ctgctgggtt tcgccacctc tgacttgagc gtcgattttt gtgatgctcg  
15121 tcaggggggg gggcctatg gaaaaacgcc agcaacgcgg ccttttttacc gttcctggcc  
15181 ttttgctcgc ccgctcgcg ctgctggaga tggcggacgc gatggatata ttctgccaag  
15241 ggttggtttg cgcattcaca gttctcgcga agaattgatt ggcctcaatt cttggagtgg  
15301 tgaatccggt agcgaggtgc cgcggcttc cattcaggtc gaggtggccc ggctccatgc  
15361 accgcgacgc aacgcgggga ggcagacaag gtatagggcg gcgctacaa tccatgccaa  
15421 ccggttccat gtgctcgcgc agcggcagata aatcgccgtg acgatcagcg gtcagtgat  
15481 cgaagttagg ctggtaagag ccgcgagcga tccctgaagc tgtccctgat ggtcgtcatc  
15541 tacctgcctg gacagcatgg cctgcaacgc gggcatcccg atgcccggg aagcgagaag  
15601 aatcataatg gggaaaggcca tccagcctcg cgtcgcgaac gccagcaaga cgtagcccag  
15661 cgcgctggcc gccatgccct gcttcatccc cgtggcccgt tgctcgcgtt tgctggcggt  
15721 gtccccggaa gaaatataat tgcattgctt tagttctatg atgacacaaa ccccggccag  
15781 cgtcttgtca ttggcgaatt cgaacacgca gatgcagtcg gggcgggcgc gtcccaggtc  
15841 cacttcgcat attaaggtga cgcgtgtggc ctcgaaaccc gagcgcacct gcagcgacc  
15901 gcttaacagc gctcaacacg tgccgcagat cccgggcaat gagatataaa aaagcctgaa  
15961 ctcaccgcga cgtctgtcga gaagtttctg atcgaaaagt tcgacagcgt ctcgacctg  
16021 atgcagctct cggagggcga agaattctgt gctttcagct tcgatgtagg agggcggtgga  
16081 tatgtcctgc gggtaaatag ctgcccagat ggtttctaca aagatcgtta tgtttatcgg  
16141 cactttgcat cggccgcgct cccgattccg gaagtgtctg acattgggga attcagcgag  
16201 agcctgacct attgcatctc ccgcccgtgca cagggtgtca cgttgcaaga cctgcccga  
16261 accgaactgc ccgctgttct gcagccggtc gcggaggcca tggatgcat cgctgcccgc  
16321 gatcttagcc agacgagcgg gttcggccca ttcggaaccg aaggaatcgg tcaatacact  
16381 acatggcgtg atttcataat gcgcatgtct gatccccatg tgtatcactg gcaaactgtg  
16441 atggacgaca ccgctcagtc gtccgtcggc caggctctcg atgagctgat gctttgggcc  
16501 gaggactgcc ccgaagtcgc gcacctcgtg cacgcggatt tcggctccaa caatgtcctg  
16561 acggacaatg gccgcataac agcggctcatt gactggagcg aggcgatgtt cggggattcc  
16621 caatacagag tcgccacaat cttcttctgg aggcctgtgt tggcttgtat ggagcagcag  
16681 acgcgctact tcgagcggag gcatccggag cttgacggat cgccggcgt cccggcgat  
16741 atgctccgca ttggtcttga ccaactctat cacagcttgg ttgacggcaa tttcgatgat  
16801 gcagcttggg cgcaggggtc atgcgacgca atcgtccgat ccggagccgg gactgtcggg  
16861 cgtacacaaa tcgccccgag aagcgcggcc gtctggaccg atggctgtgt agaagtactc  
16921 gccgatagtg gaaaccgacg ccccagcact cgtccgaggg caaaggaata ggggagatgg  
16981 gggaggctaa ctgaaacacg gaaggagaca ataccggaag gaaccgcgc tatgacggca  
17041 ataaaaagac agaataaaac gcacgggtgt tgggtcgttt gttcataaac gcggggttcg  
17101 gtcccaggggc tggcactctg tcgatacccc accgagacc ccatggggcc aatacggccg  
17161 cgttttcttc ttttccccac cccaccccc aagttcgggt gaaggcccag ggctcgcagc  
17221 caacgtcggg gcggcagccc ctgccatagc cactggcccc gtgggttagg gacggggtcc  
17281 cccatgggga atggtttatg gttcgtgggg gttattattt tggcgctgct gtggggtctg  
17341 gtcccagact ggaactgagca gacagaccca tgggttttgg atggcctggg catggaccgc  
17401 atgtactggc gcgacacgaa caccgggctg ctgtggctgc caaaccccc cgacccccaa  
17461 aaaccaccgc cgggatttct ggctgcccga gctagtgcac caattctcat gtttgacagc  
17521 ttatcatcgc agatccgggc aacgttgttg cattgtgca ggcgcagaa tggtaggtat  
17581 ggaagatcta tacattgaat caatattggc aattagccat attagtcatt ggttatatag  
17641 cataaatcaa tattggctat tggccattgc atacgttgta tctatatcat aatagtaca  
17701 tttatattgg ctcatgtcca atatgaccgc catgttgaca ttgattattg actagttatt  
17761 aatagtaatc aattaccggg tcattagttc atagccata tatggagttc cg

**Supplementary information, Figure S2 The DNA sequence of the pEB-C5 reprogramming vector (the orientation is as indicated in the graphic map in Figure S1A).**
