# Supplementary material for: Efficient human iPS cell derivation by a non-integrating plasmid from blood cells with unique epigenetic and gene expression signatures
Source: PubMed Central journal article supplement — Cell Res. 2011 Jan 18;21(3):518–29. doi: 10.1038/cr.2011.12 (PMC3193421; doi:10.1038/cr.2011.12), 2011-01-18
Supplement: cr201112x6.pdf [file cr201112x6.pdf]

### A. Growth curves

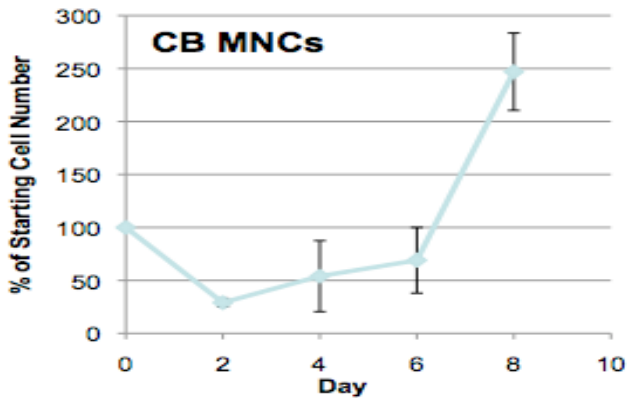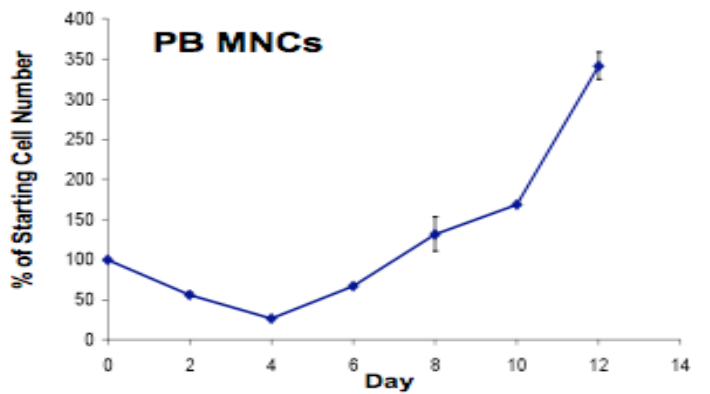

### B. CB MNCs

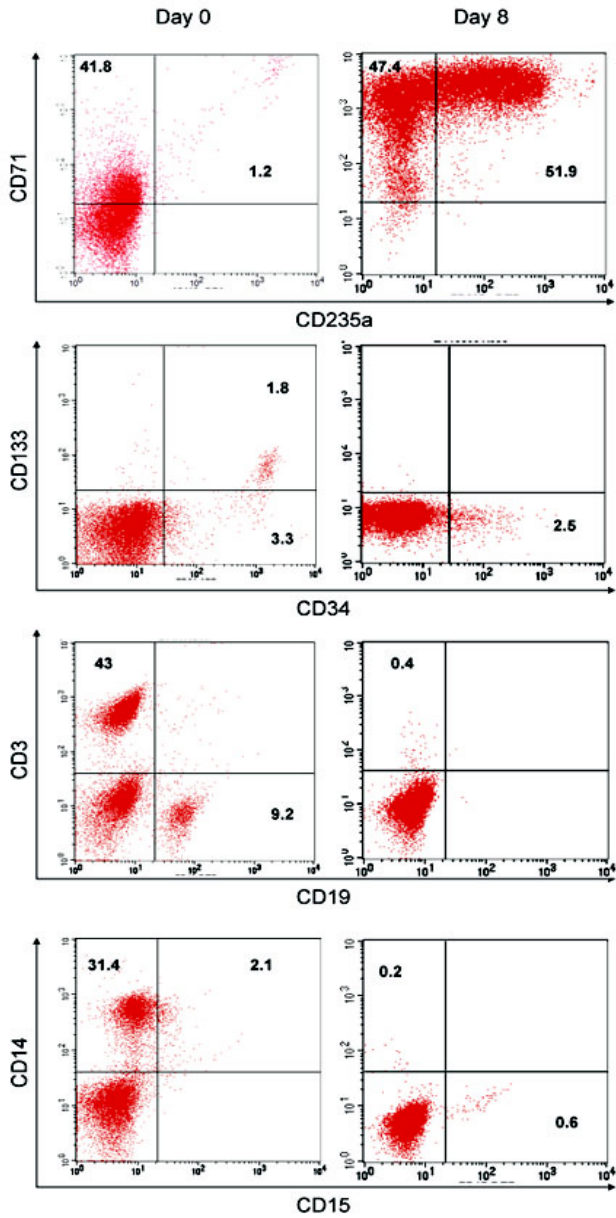

### C. Adult PB MNCs

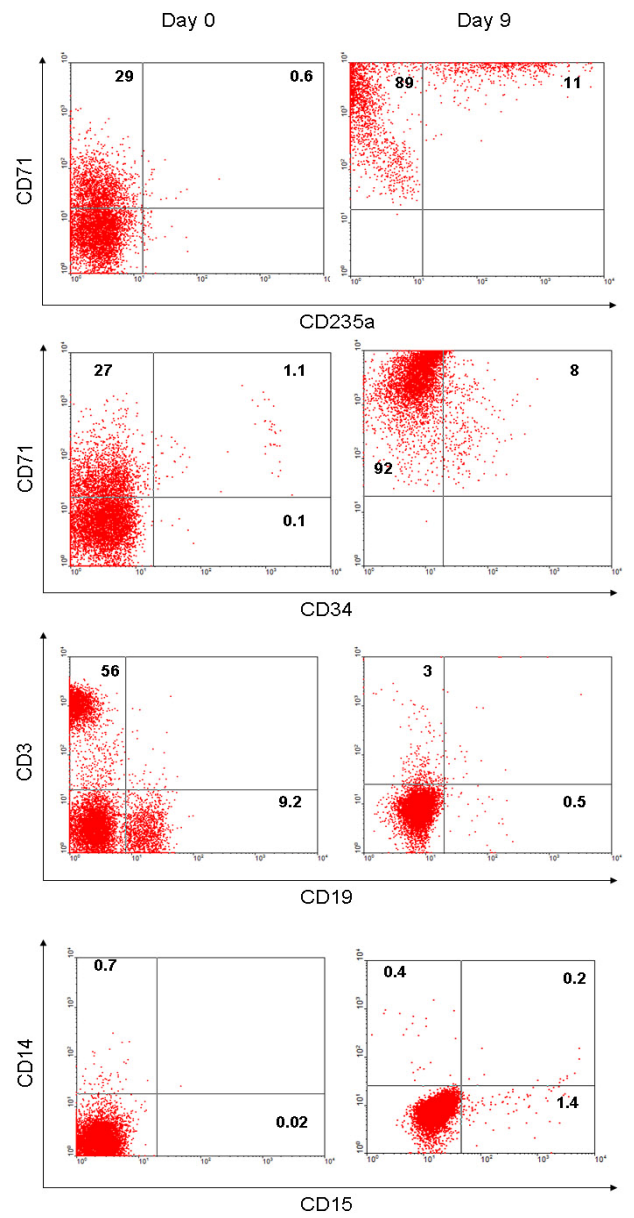

**Supplementary information, Figure S6 Growth curves and phenotypes of expanded mononuclear cells (MNCs) from newborn cord blood (CB or adult peripheral blood (PB)).**

**(A)** Plots of viable cells numbers at various days after thaw of CB and PB MNCs at day 0 (defined as 100%). Mean +/- SEM of two samples of CB and PB MNCs are shown. **(B)** Phenotypes of CB MNCs before and after 8 days of culture. **(C)** Phenotypes of adult PB MNCs (from SCD003) before and after 9 days of culture when cells were harvested for flow cytometric analysis of surface-marker expression and the remaining cells for reprogramming by nucleofection with 1-2 plasmids. The FACS gating is based on appropriate isotype-controls of each monoclonal antibody conjugated with a fluorochrome. Percentages of each population in two-color dot plots are indicated. After culture (day 8 or 9), the majority of cells resemble erythroblasts that express a high level of CD71 (transferrin receptor), some of them also express intermediate levels of CD235a (glycophorin A). Very few cells express markers for T cells (CD3, <2.4%), B cells (CD19, <0.4%), monocytes (CD14, <0.4%) and granulocytes (CD15, <1.6%) as compared to the cells before culture (day 0). Note that a cell population expressing a low-level of CD34 (2.5% and 8% for CB and PB MNCs, respectively) is also present at day 8-9, as compared to 5.1% and 1.2% CD34+ cells (at a relatively higher level) observed as day 0.
