# Supplementary material for: Efficient human iPS cell derivation by a non-integrating plasmid from blood cells with unique epigenetic and gene expression signatures
Source: PubMed Central journal article supplement — Cell Res. 2011 Jan 18;21(3):518–29. doi: 10.1038/cr.2011.12 (PMC3193421; doi:10.1038/cr.2011.12), 2011-01-18
Supplement: cr201112x7.pdf [file cr201112x7.pdf]

**A**

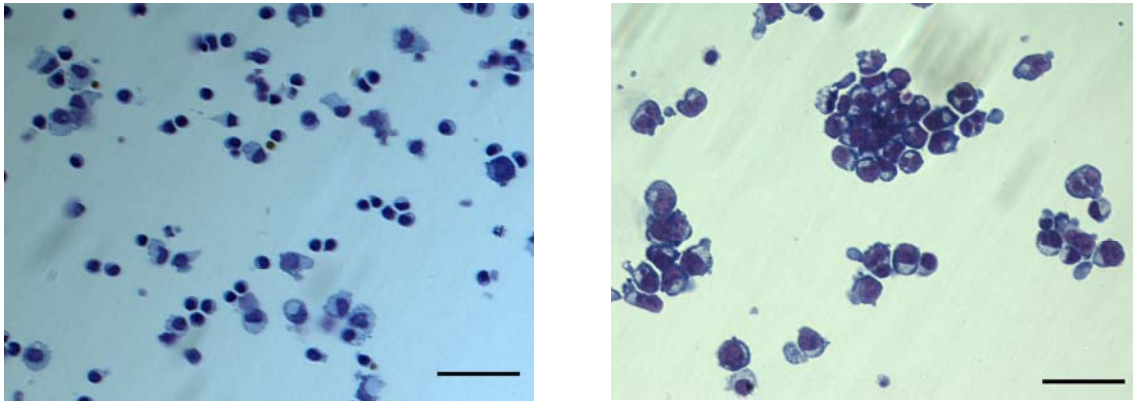

**B**

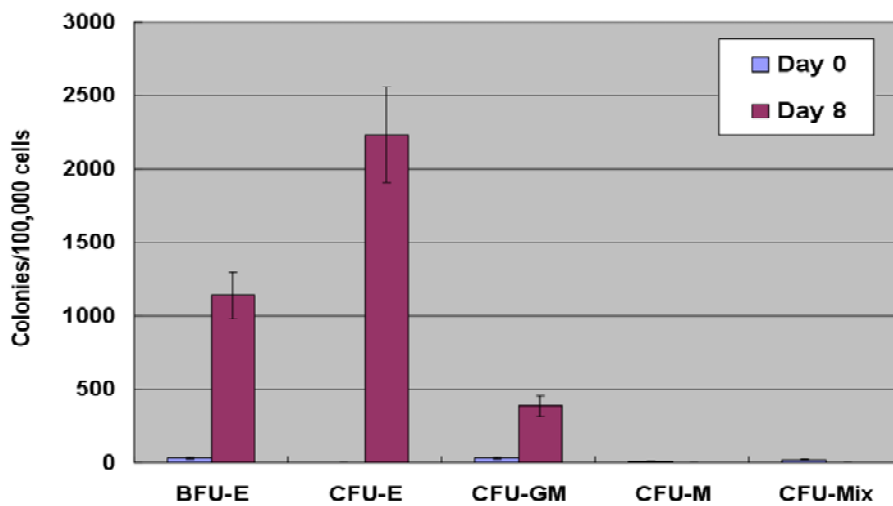

**Supplementary information, Figure S7 Morphology and functions of expanded cells from adult peripheral blood (PB) mononuclear cells (MNCs).**

**(A)** Giemsa staining of the cells cultured for 1 day (left) or 9 days (right), after being spun on slides. Scale bar: 50  $\mu\text{m}$ . Most of cells after the 9-day culture resemble erythroblasts in clusters.

**(B)** Hematopoietic progenitor assays for cells before (day 0) and after culture (day 8). After 8 days culture, the frequencies of erythroid progenitors such as burst forming unit-erythrocytes (BFU-E, immature erythroid progenitors) and colony-forming unit-erythrocytes (CFU-E, more committed erythroid progenitors) increased greatly, while progenitors of colony-forming unit-granulocytes and monocytes) increased moderately. Colony-forming unit-monocytes and colony-forming unit-with mixed cell types (multipotent erythroid/myeloid progenitors) decreased.
