# Supplementary material for: Efficient human iPS cell derivation by a non-integrating plasmid from blood cells with unique epigenetic and gene expression signatures
Source: PubMed Central journal article supplement — Cell Res. 2011 Jan 18;21(3):518–29. doi: 10.1038/cr.2011.12 (PMC3193421; doi:10.1038/cr.2011.12), 2011-01-18
Supplement: cr201112x9.pdf [file cr201112x9.pdf]

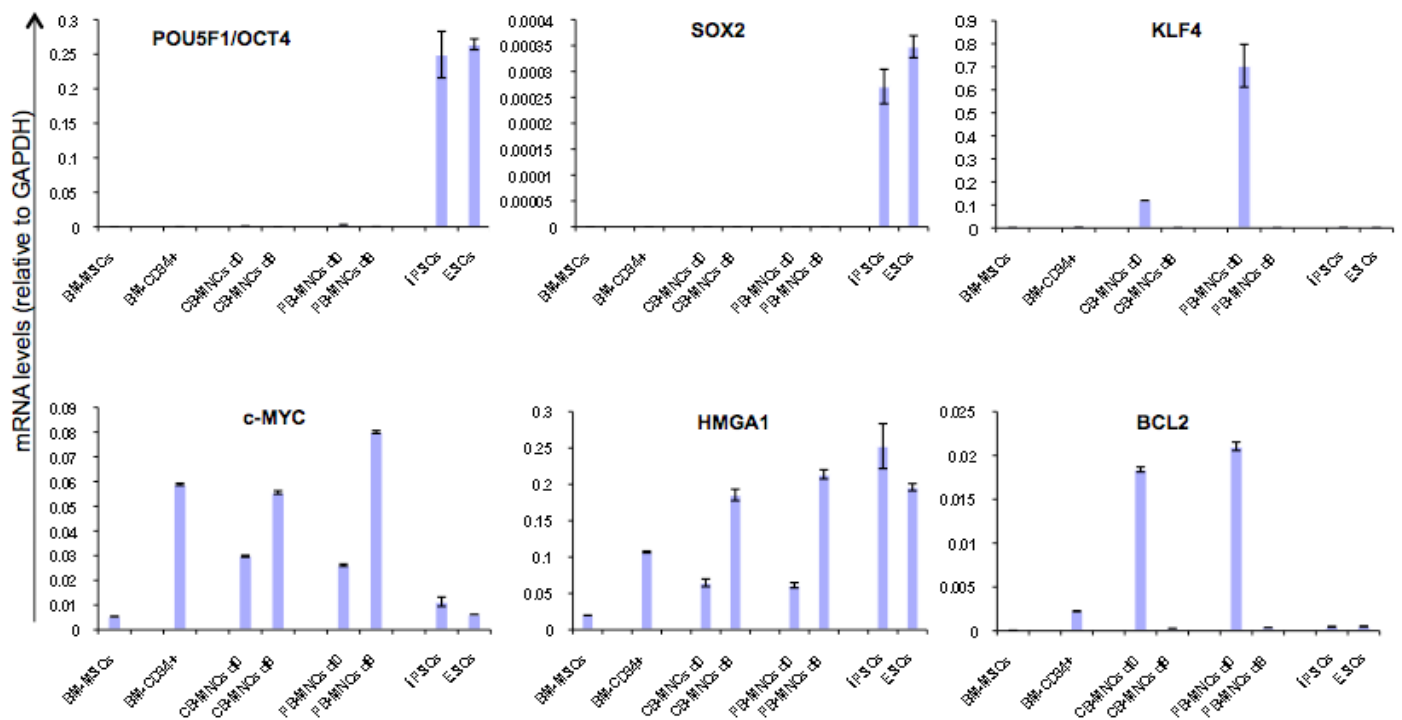

**Supplementary information, Figure S9 Analysis of mRNA levels of key genes involved in reprogramming in blood mononuclear cells (MNCs) before (day 0) and after culture and priming (day 8).**

MNCs from cord blood (CB) or adult peripheral blood (PB) were thawed at day 0. Some were used to make total RNA while the others were cultured for 8 days before reprogramming by the episomal vectors. Day 8 MNC RNA samples were also made in parallel. As controls, RNAs from cultured MSCs and CD34+ cells from adult bone marrow (BM), iPSC, and ESC line were also used for quantitative RT-PCR analysis (the *GAPDH* gene as a normalization control). The relative mRNA levels (mean  $\pm$  SEM,  $n \geq 6$ ) are plotted. As expected, the *OCT4* and *SOX2* mRNA levels in postnatal somatic cells (MSCs, CD34+ and MNCs) are negligible as compared to that in iPSCs and ESCs. Notably, *c-MYC* and *HMGA1* mRNA levels are significantly higher in cultured CD34+ cells than in cultured MSCs from the same BM donor. After the culture for 8 days, the levels of *HMGA1* as well as *c-MYC* in MNCs are significantly increased. The *BCL2* mRNA levels in newly thawed MNCs are very high, as compared to all the cultured cells (CD34+ cells are the third highest). *BCL2* is known to express highly in human CD34+ cells as well as B cells and required for their resistance to cell death. Thus it is not surprising that *BCL2* mRNA was very high in newly thawed (and survived) B cells (~10%) within CB and PB MNCs. After the culture, percentages of CD19+ B cells reduced to <0.5%. Only CD34<sup>dim</sup> cells (up to 8%) were found in the cultured MNCs.
