# Supplementary material for: Efficient human iPS cell derivation by a non-integrating plasmid from blood cells with unique epigenetic and gene expression signatures
Source: PubMed Central journal article supplement — Cell Res. 2011 Jan 18;21(3):518–29. doi: 10.1038/cr.2011.12 (PMC3193421; doi:10.1038/cr.2011.12), 2011-01-18
Supplement: cr201112x10.pdf [file cr201112x10.pdf]

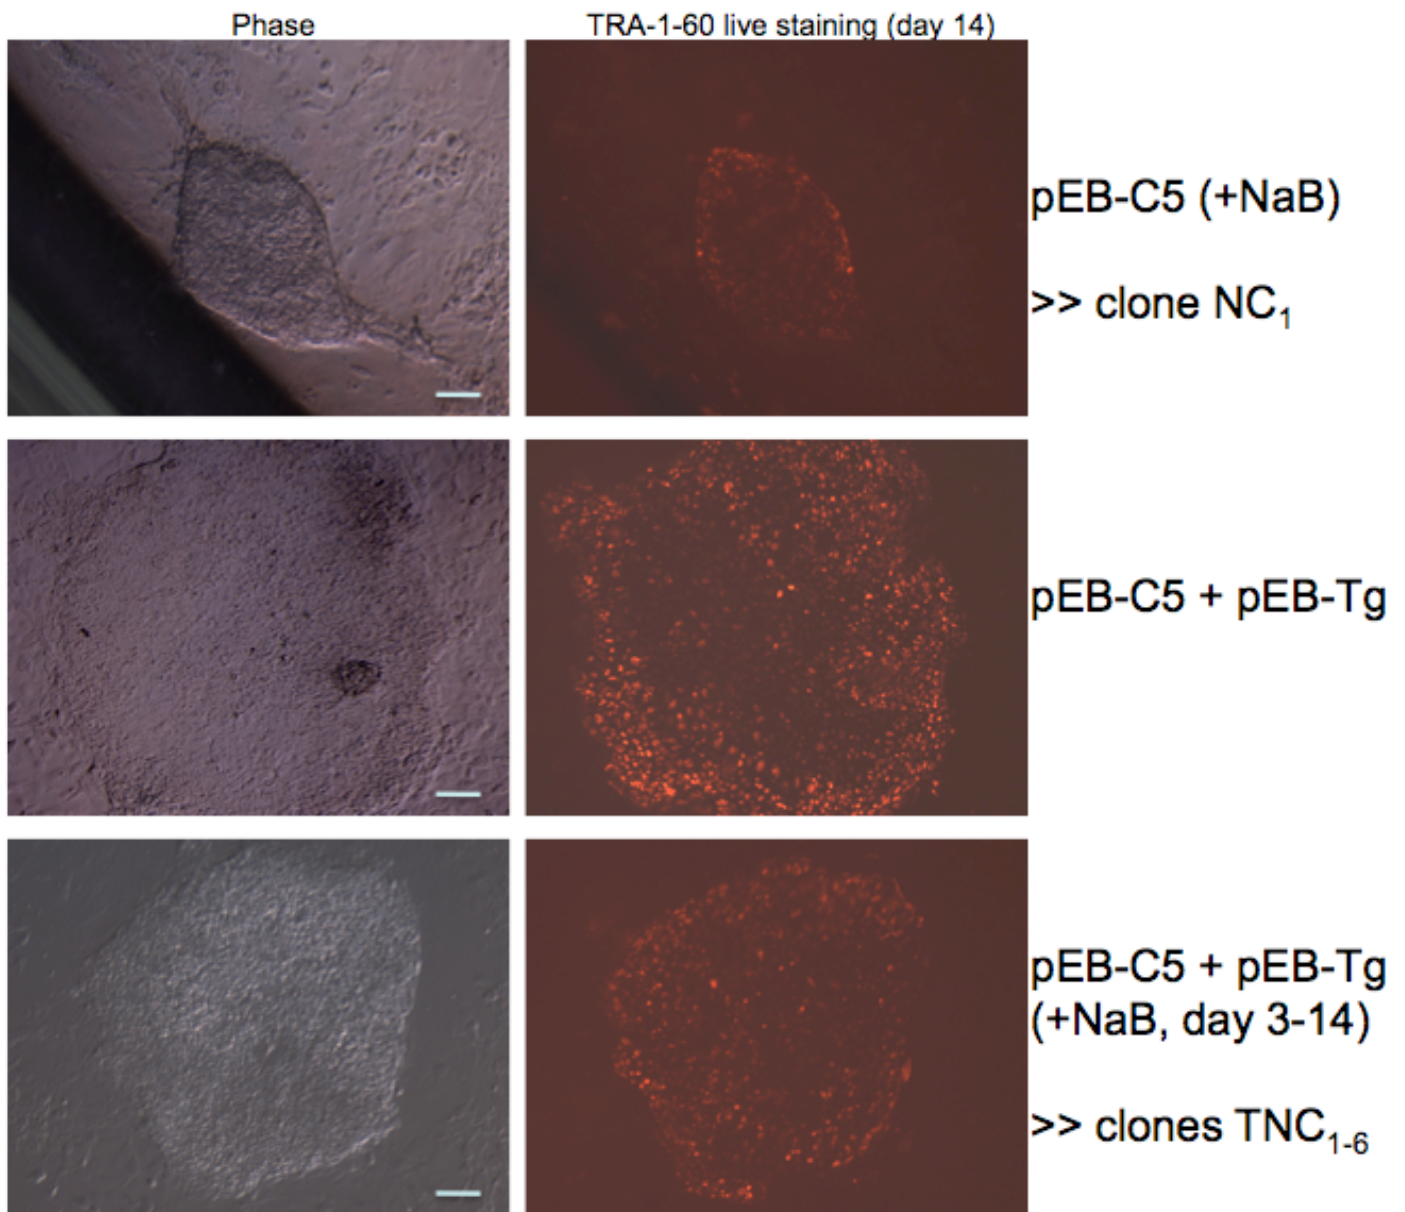

**Supplementary information, Figure S10 Reprogrammed iPSC-like colonies from un-fractionated adult peripheral blood mononuclear cells (PB MNCs).**

MNCs isolated from phlebotomized blood of an adult sickle cell patient (SCD003) were cultured for 9 days. Then  $2 \times 10^6$  expanded cells were nucleofected with up to 2 EBNA1/OriP plasmids, pEB-C5 +/- pEB-Tg. After plated on MEF-coated plates at day 2, treated cells were cultured as human ESC/iPSCs starting at day 3, with or without sodium butyrate (NaB). The images (phase and fluorescence) after live TRA-1-60+ staining at day 14 are shown. Various TRA-1-60+ colonies were hand picked soon after, and expanded at a clonal level.

Scale bar: 100  $\mu$ m.
