# Supplementary material for: Efficient human iPS cell derivation by a non-integrating plasmid from blood cells with unique epigenetic and gene expression signatures
Source: PubMed Central journal article supplement — Cell Res. 2011 Jan 18;21(3):518–29. doi: 10.1038/cr.2011.12 (PMC3193421; doi:10.1038/cr.2011.12), 2011-01-18
Supplement: cr201112x13.pdf [file cr201112x13.pdf]

**Supplementary information, Table S1 A list of loci that are hypermethylated in adult MSCs (3 samples), compared to human hematopoietic CD34+ cells (6 samples), iPSCs (17 lines) and ESCs (11 samples).**

Whether each CpG site included in the assay is associated with a CpG island or not is also indicated as true or false. Mean values in each group are shown. Two loci (*BCL2* and *HMGA1*) that are further analyzed by gene expression levels are indicated in red. The pluripotency genes such as *SOX2*, *KLF4* and *c-MYC* (CpG island associated) are hypomethylated in all the cell types; *OCT4* is hypermethylated in MSCs and CD34+ cells and hypomethylated in iPSCs and ESCs (not shown).

**Table S1. Loci corresponding to DNA hypermethylation levels in MSCs as compared to hematopoietic CD34+ cells and iPSCs/ESCs**

| <i>Cutoff in difference: 0.15</i> |                   |                     |                            |                       |                      |                   |                  |
|-----------------------------------|-------------------|---------------------|----------------------------|-----------------------|----------------------|-------------------|------------------|
| <b>SYMBOL</b>                     | <b>CpG_ISLAND</b> | <b>MSCs<br/>(3)</b> | <b>CD34+ Cells<br/>(6)</b> | <b>iPSCs<br/>(17)</b> | <b>ESCs<br/>(11)</b> | <b>TargetID</b>   | <b>CHR<br/>#</b> |
| ADAMTS18                          | TRUE              | 0.67                | 0.20                       | 0.28                  | 0.28                 | cg20807545        | 16               |
| ADAMTSL1                          | TRUE              | 0.56                | 0.19                       | 0.16                  | 0.12                 | cg16714091        | 9                |
| ADCY1                             | TRUE              | 0.31                | 0.11                       | 0.11                  | 0.11                 | cg13523557        | 7                |
| ADCY2                             | TRUE              | 0.87                | 0.07                       | 0.08                  | 0.09                 | cg04907257        | 5                |
| AKAP2                             | TRUE              | 0.69                | 0.10                       | 0.08                  | 0.08                 | cg15083233        | 9                |
| ALDH1A3                           | TRUE              | 0.60                | 0.09                       | 0.09                  | 0.11                 | cg27652350        | 15               |
| ALDH1A3                           | TRUE              | 0.86                | 0.17                       | 0.26                  | 0.21                 | cg23191950        | 15               |
| ALDH1A3                           | TRUE              | 0.82                | 0.10                       | 0.10                  | 0.09                 | cg19224278        | 15               |
| ALDH1A3                           | TRUE              | 0.84                | 0.07                       | 0.07                  | 0.06                 | cg26509022        | 15               |
| ALX4                              | TRUE              | 0.44                | 0.07                       | 0.08                  | 0.08                 | cg07696033        | 11               |
| ALX4                              | TRUE              | 0.60                | 0.17                       | 0.18                  | 0.14                 | cg25363445        | 11               |
| ALX4                              | TRUE              | 0.83                | 0.40                       | 0.38                  | 0.37                 | cg23058901        | 11               |
| ALX4                              | TRUE              | 0.64                | 0.08                       | 0.08                  | 0.06                 | cg11260848        | 11               |
| ALX4                              | TRUE              | 0.82                | 0.24                       | 0.18                  | 0.14                 | cg00418150        | 11               |
| ALX4                              | TRUE              | 0.70                | 0.10                       | 0.13                  | 0.11                 | cg08993172        | 11               |
| ALX4                              | TRUE              | 0.89                | 0.25                       | 0.31                  | 0.29                 | cg15522957        | 11               |
| ALX4                              | TRUE              | 0.71                | 0.06                       | 0.06                  | 0.05                 | cg00415164        | 11               |
| ALX4                              | TRUE              | 0.71                | 0.03                       | 0.04                  | 0.03                 | cg08914623        | 11               |
| ALX4                              | TRUE              | 0.90                | 0.10                       | 0.12                  | 0.08                 | cg18546622        | 11               |
| ALX4                              | TRUE              | 0.88                | 0.05                       | 0.08                  | 0.07                 | cg04970352        | 11               |
| ALX4                              | TRUE              | 0.87                | 0.04                       | 0.05                  | 0.05                 | cg14144305        | 11               |
| ALX4                              | TRUE              | 0.96                | 0.10                       | 0.13                  | 0.08                 | cg00061629        | 11               |
| ALX4                              | TRUE              | 0.96                | 0.08                       | 0.05                  | 0.04                 | cg19358442        | 11               |
| ALX4                              | TRUE              | 0.94                | 0.05                       | 0.07                  | 0.05                 | cg04549333        | 11               |
| AMPD3                             | TRUE              | 0.43                | 0.23                       | 0.09                  | 0.08                 | cg24921089        | 11               |
| AP1G2                             | FALSE             | 0.32                | 0.09                       | 0.17                  | 0.17                 | cg02945646        | 14               |
| APXL2                             | TRUE              | 0.92                | 0.18                       | 0.15                  | 0.17                 | cg16609957        | 5                |
| BAMBI                             | TRUE              | 0.40                | 0.08                       | 0.07                  | 0.06                 | cg16408970        | 10               |
| BANK1                             | TRUE              | 0.36                | 0.04                       | 0.20                  | 0.19                 | cg25023994        | 4                |
| <b>BCL2</b>                       | <b>TRUE</b>       | <b>0.73</b>         | <b>0.21</b>                | <b>0.25</b>           | <b>0.29</b>          | <b>cg24408313</b> | <b>18</b>        |
| BNC1                              | TRUE              | 0.28                | 0.12                       | 0.11                  | 0.10                 | cg15736165        | 15               |
| BNC1                              | TRUE              | 0.29                | 0.09                       | 0.11                  | 0.12                 | cg10398682        | 15               |
| C10orf82                          | TRUE              | 0.32                | 0.15                       | 0.05                  | 0.06                 | cg07621046        | 10               |
| C1orf188                          | TRUE              | 0.45                | 0.04                       | 0.04                  | 0.05                 | cg15731815        | 1                |
| C1orf87                           | TRUE              | 0.31                | 0.13                       | 0.12                  | 0.14                 | cg09851465        | 1                |
| C1QL1                             | TRUE              | 0.80                | 0.21                       | 0.12                  | 0.09                 | cg16772514        | 17               |
| CACHD1                            | TRUE              | 0.64                | 0.24                       | 0.16                  | 0.16                 | cg20876010        | 1                |

|          |       |      |      |      |      |            |    |
|----------|-------|------|------|------|------|------------|----|
| CBX2     | TRUE  | 0.73 | 0.33 | 0.12 | 0.10 | cg22892904 | 17 |
| CCNA1    | TRUE  | 0.31 | 0.10 | 0.09 | 0.08 | cg16422907 | 13 |
| CDCP1    | TRUE  | 0.81 | 0.31 | 0.33 | 0.37 | cg15779716 | 3  |
| CDKN2B   | TRUE  | 0.47 | 0.05 | 0.04 | 0.04 | cg10210238 | 9  |
| CDKN2B   | TRUE  | 0.62 | 0.17 | 0.10 | 0.09 | cg06421800 | 9  |
| CDKN2B   | TRUE  | 0.76 | 0.10 | 0.09 | 0.07 | cg08390209 | 9  |
| CDKN2B   | TRUE  | 0.86 | 0.19 | 0.09 | 0.08 | cg18979223 | 9  |
| CDKN2B   | TRUE  | 0.85 | 0.11 | 0.09 | 0.08 | cg04675937 | 9  |
| CDKN2B   | TRUE  | 0.84 | 0.07 | 0.07 | 0.06 | cg19481686 | 9  |
| CHRN4    | FALSE | 0.32 | 0.17 | 0.03 | 0.03 | cg21402071 | 15 |
| CORO6    | TRUE  | 0.44 | 0.05 | 0.12 | 0.10 | cg26388152 | 17 |
| CPXM2    | TRUE  | 0.41 | 0.18 | 0.13 | 0.15 | cg09619146 | 10 |
| CR1      | TRUE  | 0.25 | 0.08 | 0.13 | 0.13 | cg14726637 | 1  |
| CRYGN    | FALSE | 0.71 | 0.40 | 0.14 | 0.12 | cg22830895 | 7  |
| CRYGN    | TRUE  | 0.80 | 0.14 | 0.17 | 0.14 | cg21035142 | 7  |
| CTDSP2   | TRUE  | 0.37 | 0.18 | 0.15 | 0.20 | cg02732509 | 12 |
| CTSZ     | TRUE  | 0.50 | 0.06 | 0.11 | 0.13 | cg16179125 | 20 |
| DAPK1    | TRUE  | 0.67 | 0.18 | 0.19 | 0.19 | cg24754277 | 9  |
| DEF6     | TRUE  | 0.45 | 0.05 | 0.11 | 0.10 | cg07294541 | 6  |
| DEF6     | TRUE  | 0.64 | 0.07 | 0.11 | 0.09 | cg14960043 | 6  |
| DHRS10   | TRUE  | 0.54 | 0.06 | 0.05 | 0.05 | cg15974053 | 19 |
| DHRS10   | TRUE  | 0.77 | 0.23 | 0.05 | 0.05 | cg26267310 | 19 |
| DHRS3    | TRUE  | 0.67 | 0.09 | 0.05 | 0.05 | cg01346152 | 1  |
| DKK3     | FALSE | 0.72 | 0.23 | 0.35 | 0.38 | cg25787984 | 11 |
| DLX1     | TRUE  | 0.32 | 0.12 | 0.17 | 0.17 | cg15236866 | 2  |
| DLX5     | TRUE  | 0.28 | 0.13 | 0.16 | 0.11 | cg13462129 | 7  |
| DLX5     | TRUE  | 0.32 | 0.15 | 0.16 | 0.14 | cg12041387 | 7  |
| DLX5     | TRUE  | 0.32 | 0.12 | 0.10 | 0.07 | cg20080624 | 7  |
| DLX5     | TRUE  | 0.53 | 0.14 | 0.12 | 0.09 | cg00503840 | 7  |
| EDG4     | TRUE  | 0.69 | 0.19 | 0.14 | 0.16 | cg10521852 | 19 |
| EFEMP1   | TRUE  | 0.42 | 0.19 | 0.07 | 0.05 | cg25711779 | 2  |
| EN1      | TRUE  | 0.38 | 0.11 | 0.12 | 0.10 | cg03266453 | 2  |
| ENTPD2   | TRUE  | 0.48 | 0.12 | 0.12 | 0.14 | cg25483003 | 9  |
| EPHA1    | TRUE  | 0.27 | 0.12 | 0.12 | 0.11 | cg18997129 | 7  |
| ESR1     | TRUE  | 0.86 | 0.49 | 0.22 | 0.18 | cg15626350 | 6  |
| ESR1     | TRUE  | 0.72 | 0.05 | 0.06 | 0.06 | cg20253551 | 6  |
| ESR1     | TRUE  | 0.87 | 0.05 | 0.05 | 0.04 | cg02720618 | 6  |
| ETV7     | TRUE  | 0.28 | 0.08 | 0.14 | 0.16 | cg04289385 | 6  |
| EYA4     | TRUE  | 0.69 | 0.09 | 0.08 | 0.09 | cg07327468 | 6  |
| EYA4     | TRUE  | 0.90 | 0.16 | 0.23 | 0.23 | cg21296676 | 6  |
| F11R     | TRUE  | 0.50 | 0.07 | 0.11 | 0.07 | cg00446235 | 1  |
| FAM46B   | TRUE  | 0.41 | 0.18 | 0.09 | 0.08 | cg16352283 | 1  |
| FBLN2    | TRUE  | 0.39 | 0.20 | 0.14 | 0.13 | cg16604516 | 3  |
| FBXO6    | TRUE  | 0.58 | 0.13 | 0.14 | 0.16 | cg10667970 | 1  |
| FERD3L   | TRUE  | 0.64 | 0.04 | 0.06 | 0.08 | cg25691167 | 7  |
| FERD3L   | TRUE  | 0.75 | 0.10 | 0.10 | 0.12 | cg11241627 | 7  |
| FGF19    | TRUE  | 0.31 | 0.12 | 0.19 | 0.21 | cg26096837 | 11 |
| FLJ20032 | TRUE  | 0.36 | 0.11 | 0.13 | 0.11 | cg07360692 | 4  |
| FLJ20701 | FALSE | 0.81 | 0.45 | 0.32 | 0.37 | cg02799466 | 2  |
| FLJ32447 | TRUE  | 0.33 | 0.12 | 0.13 | 0.10 | cg25596297 | 2  |
| FLJ90166 | TRUE  | 0.36 | 0.12 | 0.08 | 0.05 | cg23418591 | 20 |
| FMNL1    | TRUE  | 0.41 | 0.09 | 0.16 | 0.17 | cg00853068 | 17 |
| FOXL1    | TRUE  | 0.72 | 0.05 | 0.09 | 0.06 | cg06995715 | 16 |
| FOXO1A   | TRUE  | 0.31 | 0.11 | 0.15 | 0.11 | cg26611683 | 13 |
| FXYD7    | TRUE  | 0.83 | 0.17 | 0.24 | 0.31 | cg17682828 | 19 |
| FXYD7    | TRUE  | 0.76 | 0.05 | 0.07 | 0.05 | cg22392666 | 19 |
| GIPC2    | TRUE  | 0.31 | 0.11 | 0.14 | 0.16 | cg09107315 | 1  |
| GJB2     | TRUE  | 0.59 | 0.25 | 0.21 | 0.20 | cg11054936 | 13 |

|          |       |      |      |      |      |            |    |
|----------|-------|------|------|------|------|------------|----|
| GJB6     | TRUE  | 0.40 | 0.11 | 0.12 | 0.12 | cg03473518 | 13 |
| GJB6     | TRUE  | 0.44 | 0.05 | 0.06 | 0.07 | cg22377389 | 13 |
| GP1BB    | TRUE  | 0.94 | 0.05 | 0.14 | 0.08 | cg07359545 | 22 |
| GPR160   | TRUE  | 0.37 | 0.14 | 0.10 | 0.11 | cg18741908 | 3  |
| GRASP    | FALSE | 0.84 | 0.07 | 0.39 | 0.38 | cg22566906 | 12 |
| GREM1    | TRUE  | 0.29 | 0.07 | 0.13 | 0.11 | cg18145505 | 15 |
| HIST1H1D | FALSE | 0.61 | 0.36 | 0.33 | 0.33 | cg05554718 | 6  |
| HMGA1    | TRUE  | 0.65 | 0.06 | 0.06 | 0.06 | cg03020951 | 6  |
| HOXA11   | TRUE  | 0.62 | 0.05 | 0.09 | 0.08 | cg15760840 | 7  |
| HOXA2    | TRUE  | 0.39 | 0.17 | 0.15 | 0.08 | cg09871315 | 7  |
| HOXB4    | TRUE  | 0.32 | 0.08 | 0.10 | 0.08 | cg21460081 | 17 |
| HOXB8    | TRUE  | 0.39 | 0.14 | 0.17 | 0.13 | cg15539420 | 17 |
| HOXD13   | TRUE  | 0.47 | 0.16 | 0.16 | 0.12 | cg19325985 | 2  |
| HOXD3    | TRUE  | 0.58 | 0.05 | 0.06 | 0.05 | cg18702197 | 2  |
| HOXD3    | FALSE | 0.74 | 0.19 | 0.22 | 0.22 | cg00005847 | 2  |
| HOXD4    | TRUE  | 0.66 | 0.07 | 0.08 | 0.06 | cg18750960 | 2  |
| HOXD4    | TRUE  | 0.69 | 0.10 | 0.18 | 0.17 | cg14399060 | 2  |
| HOXD4    | TRUE  | 0.76 | 0.10 | 0.11 | 0.09 | cg01152019 | 2  |
| HOXD4    | TRUE  | 0.88 | 0.17 | 0.19 | 0.15 | cg12127282 | 2  |
| HOXD4    | TRUE  | 0.91 | 0.20 | 0.29 | 0.31 | cg00767581 | 2  |
| HR       | TRUE  | 0.30 | 0.09 | 0.13 | 0.13 | cg26045434 | 8  |
| HSF4     | TRUE  | 0.57 | 0.09 | 0.22 | 0.15 | cg22374142 | 16 |
| HTRA4    | TRUE  | 0.91 | 0.24 | 0.18 | 0.19 | cg12535715 | 8  |
| HTRA4    | TRUE  | 0.89 | 0.11 | 0.13 | 0.13 | cg27258399 | 8  |
| IGF2AS   | TRUE  | 0.36 | 0.09 | 0.10 | 0.08 | cg13791131 | 11 |
| IGF2AS   | TRUE  | 0.39 | 0.07 | 0.07 | 0.07 | cg20792294 | 11 |
| IGF2AS   | TRUE  | 0.39 | 0.04 | 0.04 | 0.03 | cg25574024 | 11 |
| IGF2AS   | TRUE  | 0.49 | 0.11 | 0.13 | 0.11 | cg21237591 | 11 |
| IL15RA   | FALSE | 0.37 | 0.17 | 0.17 | 0.16 | cg09290866 | 10 |
| IL18     | FALSE | 0.66 | 0.19 | 0.26 | 0.24 | cg11304234 | 11 |
| IL20RA   | TRUE  | 0.47 | 0.22 | 0.14 | 0.12 | cg04481779 | 6  |
| IRXL1    | TRUE  | 0.47 | 0.11 | 0.09 | 0.08 | cg02161900 | 10 |
| KCNC3    | TRUE  | 0.28 | 0.06 | 0.13 | 0.15 | cg06572160 | 19 |
| KCNIP2   | FALSE | 0.31 | 0.09 | 0.12 | 0.10 | cg25123470 | 10 |
| KCNJ4    | FALSE | 0.73 | 0.33 | 0.39 | 0.39 | cg20674521 | 22 |
| KCNQ1    | TRUE  | 0.34 | 0.08 | 0.21 | 0.17 | cg05418487 | 11 |
| KCNQ1DN  | TRUE  | 0.40 | 0.18 | 0.19 | 0.13 | cg01530101 | 11 |
| KCNQ1DN  | TRUE  | 0.47 | 0.12 | 0.25 | 0.13 | cg05656180 | 11 |
| KCNQ4    | TRUE  | 0.33 | 0.07 | 0.09 | 0.07 | cg00630164 | 1  |
| KIAA0746 | TRUE  | 0.41 | 0.08 | 0.07 | 0.06 | cg10150813 | 4  |
| KIFC2    | TRUE  | 0.30 | 0.10 | 0.10 | 0.09 | cg11290225 | 8  |
| LAMB1    | TRUE  | 0.29 | 0.12 | 0.15 | 0.17 | cg10064162 | 7  |
| LAMC2    | FALSE | 0.88 | 0.27 | 0.06 | 0.07 | cg23696949 | 1  |
| LASS2    | TRUE  | 0.65 | 0.28 | 0.29 | 0.33 | cg18611122 | 1  |
| LRRFIP1  | TRUE  | 0.94 | 0.10 | 0.05 | 0.04 | cg09037813 | 2  |
| MAB21L1  | TRUE  | 0.32 | 0.16 | 0.15 | 0.15 | cg05093686 | 13 |
| MEST     | TRUE  | 0.58 | 0.13 | 0.25 | 0.20 | cg15164103 | 7  |
| MEST     | TRUE  | 0.74 | 0.13 | 0.34 | 0.16 | cg09059945 | 7  |
| MEST     | TRUE  | 0.78 | 0.07 | 0.40 | 0.24 | cg01888566 | 7  |
| MEST     | TRUE  | 0.89 | 0.12 | 0.27 | 0.15 | cg09872616 | 7  |
| MEST     | TRUE  | 0.86 | 0.09 | 0.30 | 0.17 | cg08077673 | 7  |
| MGC39715 | TRUE  | 0.66 | 0.30 | 0.26 | 0.30 | cg17199658 | 8  |
| MIXL1    | TRUE  | 0.53 | 0.35 | 0.23 | 0.24 | cg18354264 | 1  |
| MSX1     | TRUE  | 0.37 | 0.08 | 0.09 | 0.08 | cg20161179 | 4  |
| MSX1     | TRUE  | 0.49 | 0.14 | 0.17 | 0.15 | cg20588069 | 4  |
| MSX1     | TRUE  | 0.71 | 0.34 | 0.14 | 0.15 | cg03843978 | 4  |
| MSX1     | TRUE  | 0.94 | 0.52 | 0.27 | 0.30 | cg20891301 | 4  |
| MSX1     | TRUE  | 0.88 | 0.33 | 0.16 | 0.18 | cg01785568 | 4  |

|          |       |      |      |      |      |            |    |
|----------|-------|------|------|------|------|------------|----|
| MSX1     | TRUE  | 0.80 | 0.24 | 0.21 | 0.17 | cg22609784 | 4  |
| MSX1     | TRUE  | 0.97 | 0.40 | 0.15 | 0.12 | cg09748975 | 4  |
| MSX1     | TRUE  | 0.90 | 0.28 | 0.30 | 0.28 | cg09573795 | 4  |
| MSX1     | TRUE  | 0.90 | 0.25 | 0.12 | 0.10 | cg24840099 | 4  |
| MTNR1A   | TRUE  | 0.68 | 0.28 | 0.24 | 0.21 | cg06039392 | 4  |
| NAGS     | TRUE  | 0.42 | 0.08 | 0.06 | 0.06 | cg04032226 | 17 |
| NEBL     | TRUE  | 0.44 | 0.13 | 0.10 | 0.08 | cg18192417 | 10 |
| NEBL     | TRUE  | 0.71 | 0.25 | 0.19 | 0.17 | cg24625388 | 10 |
| NEIL1    | TRUE  | 0.82 | 0.31 | 0.20 | 0.23 | cg12978308 | 15 |
| NFATC2   | TRUE  | 0.41 | 0.08 | 0.22 | 0.22 | cg11086066 | 20 |
| NFATC2   | TRUE  | 0.65 | 0.12 | 0.17 | 0.17 | cg10226546 | 20 |
| NGFB     | TRUE  | 0.72 | 0.06 | 0.04 | 0.04 | cg21184174 | 1  |
| NR2F6    | FALSE | 0.32 | 0.15 | 0.13 | 0.16 | cg16749578 | 19 |
| OLFM2    | TRUE  | 0.35 | 0.16 | 0.10 | 0.07 | cg00208967 | 19 |
| PAPSS1   | TRUE  | 0.60 | 0.15 | 0.21 | 0.18 | cg09191232 | 4  |
| PAX1     | FALSE | 0.61 | 0.26 | 0.21 | 0.19 | cg20907471 | 20 |
| PAX3     | TRUE  | 0.29 | 0.13 | 0.09 | 0.07 | cg19352038 | 2  |
| PAX9     | TRUE  | 0.61 | 0.10 | 0.11 | 0.09 | cg00509670 | 14 |
| PAX9     | TRUE  | 0.67 | 0.08 | 0.11 | 0.11 | cg26620157 | 14 |
| PCDHGC4  | TRUE  | 0.34 | 0.16 | 0.16 | 0.14 | cg12145907 | 5  |
| PCDHGC4  | TRUE  | 0.36 | 0.07 | 0.08 | 0.06 | cg15361590 | 5  |
| PIP5KL1  | TRUE  | 0.37 | 0.13 | 0.11 | 0.09 | cg10082841 | 9  |
| PIPOX    | FALSE | 0.46 | 0.20 | 0.13 | 0.10 | cg06144905 | 17 |
| PITX1    | TRUE  | 0.62 | 0.21 | 0.12 | 0.08 | cg24495017 | 5  |
| PITX2    | TRUE  | 0.57 | 0.10 | 0.04 | 0.04 | cg14056644 | 4  |
| PLEC1    | TRUE  | 0.41 | 0.15 | 0.11 | 0.09 | cg01242619 | 8  |
| PPP1R16B | TRUE  | 0.83 | 0.08 | 0.15 | 0.11 | cg27377213 | 20 |
| PPP1R9A  | TRUE  | 0.75 | 0.12 | 0.10 | 0.10 | cg11164400 | 7  |
| PRIMA1   | TRUE  | 0.38 | 0.15 | 0.16 | 0.12 | cg20895877 | 14 |
| PRP2     | TRUE  | 0.82 | 0.05 | 0.12 | 0.20 | cg15518950 | 5  |
| PRPH     | TRUE  | 0.37 | 0.06 | 0.09 | 0.08 | cg09595479 | 12 |
| PTEN     | TRUE  | 0.29 | 0.06 | 0.13 | 0.17 | cg21480743 | 10 |
| PTGIS    | FALSE | 0.62 | 0.29 | 0.18 | 0.27 | cg07612655 | 20 |
| PTHLH    | FALSE | 0.69 | 0.41 | 0.28 | 0.25 | cg21788470 | 12 |
| PTHLH    | FALSE | 0.74 | 0.13 | 0.26 | 0.23 | cg01333011 | 12 |
| PTMS     | FALSE | 0.38 | 0.16 | 0.08 | 0.07 | cg20006825 | 12 |
| PTPN6    | TRUE  | 0.91 | 0.09 | 0.11 | 0.14 | cg04956511 | 12 |
| PYY      | TRUE  | 0.41 | 0.08 | 0.08 | 0.06 | cg09467501 | 17 |
| RBM35B   | TRUE  | 0.37 | 0.21 | 0.05 | 0.05 | cg20264732 | 16 |
| RBP1     | TRUE  | 0.61 | 0.15 | 0.12 | 0.16 | cg13099330 | 3  |
| RBP1     | TRUE  | 0.74 | 0.08 | 0.05 | 0.06 | cg23363832 | 3  |
| RCS1     | FALSE | 0.70 | 0.14 | 0.26 | 0.30 | cg12336540 | 1  |
| REG      | TRUE  | 0.62 | 0.34 | 0.27 | 0.29 | cg19205533 | 12 |
| RHOH     | TRUE  | 0.49 | 0.12 | 0.19 | 0.19 | cg00804392 | 4  |
| RHOQ     | TRUE  | 0.43 | 0.10 | 0.11 | 0.09 | cg26251101 | 2  |
| RSHL1    | TRUE  | 0.40 | 0.16 | 0.08 | 0.08 | cg27118825 | 19 |
| RUNX3    | TRUE  | 0.78 | 0.08 | 0.07 | 0.07 | cg00117172 | 1  |
| SEMA3B   | TRUE  | 0.51 | 0.03 | 0.16 | 0.14 | cg12069309 | 3  |
| SFRP2    | TRUE  | 0.37 | 0.16 | 0.18 | 0.16 | cg07694025 | 4  |
| SHC3     | TRUE  | 0.33 | 0.13 | 0.13 | 0.10 | cg13351583 | 9  |
| SIM2     | TRUE  | 0.47 | 0.16 | 0.16 | 0.15 | cg02672220 | 21 |
| SLC15A3  | TRUE  | 0.36 | 0.15 | 0.09 | 0.08 | cg21992250 | 11 |
| SLC16A3  | TRUE  | 0.54 | 0.05 | 0.14 | 0.15 | cg14417329 | 17 |
| SLC1A2   | TRUE  | 0.71 | 0.06 | 0.07 | 0.06 | cg08258650 | 11 |
| SLC26A10 | TRUE  | 0.83 | 0.35 | 0.28 | 0.35 | cg12883767 | 12 |
| SLC26A10 | FALSE | 0.84 | 0.20 | 0.20 | 0.21 | cg14371590 | 12 |
| SLC27A6  | TRUE  | 0.28 | 0.11 | 0.17 | 0.17 | cg20103758 | 5  |
| SMAD2    | FALSE | 0.58 | 0.16 | 0.18 | 0.18 | cg03294491 | 18 |

|           |       |      |      |      |      |            |    |
|-----------|-------|------|------|------|------|------------|----|
| SNTB1     | FALSE | 0.60 | 0.44 | 0.22 | 0.28 | cg08598221 | 8  |
| SORT1     | TRUE  | 0.44 | 0.25 | 0.14 | 0.13 | cg02175308 | 1  |
| SPAG17    | TRUE  | 0.32 | 0.10 | 0.10 | 0.09 | cg04624659 | 1  |
| SPON1     | TRUE  | 0.38 | 0.24 | 0.13 | 0.15 | cg09191626 | 11 |
| STC2      | TRUE  | 0.89 | 0.43 | 0.11 | 0.12 | cg19728382 | 5  |
| STK38     | FALSE | 0.69 | 0.30 | 0.29 | 0.34 | cg02964385 | 6  |
| SULF1     | FALSE | 0.47 | 0.23 | 0.19 | 0.18 | cg04845579 | 8  |
| SUPT3H    | TRUE  | 0.48 | 0.14 | 0.22 | 0.21 | cg05112986 | 6  |
| TAL1      | TRUE  | 0.28 | 0.13 | 0.11 | 0.09 | cg19797376 | 1  |
| TBR1      | FALSE | 0.39 | 0.13 | 0.17 | 0.16 | cg14187678 | 2  |
| TBR1      | TRUE  | 0.66 | 0.13 | 0.15 | 0.15 | cg06747888 | 2  |
| TBX1      | TRUE  | 0.48 | 0.19 | 0.26 | 0.14 | cg16722536 | 22 |
| TBX4      | TRUE  | 0.63 | 0.19 | 0.19 | 0.18 | cg03866607 | 17 |
| TBX4      | TRUE  | 0.75 | 0.08 | 0.14 | 0.16 | cg18536148 | 17 |
| TCF8      | TRUE  | 0.50 | 0.10 | 0.10 | 0.12 | cg24861272 | 10 |
| TCTEX1D1  | TRUE  | 0.28 | 0.09 | 0.10 | 0.11 | cg17819635 | 1  |
| TGFBR3    | TRUE  | 0.70 | 0.13 | 0.14 | 0.13 | cg00563926 | 1  |
| TGIF2     | TRUE  | 0.32 | 0.13 | 0.12 | 0.11 | cg12556134 | 20 |
| TNFRSF10C | TRUE  | 0.37 | 0.08 | 0.18 | 0.21 | cg05636175 | 8  |
| TWIST1    | TRUE  | 0.44 | 0.07 | 0.08 | 0.08 | cg09674215 | 7  |
| USP2      | TRUE  | 0.39 | 0.10 | 0.10 | 0.08 | cg27234090 | 11 |
| VAMP8     | FALSE | 0.72 | 0.06 | 0.13 | 0.11 | cg05656364 | 2  |
| VEPH1     | TRUE  | 0.31 | 0.15 | 0.14 | 0.10 | cg14106308 | 3  |
